# Supplementary material for: The Platelet-activating Factor Receptor’s Association with the Outcome of Ovarian Cancer Patients and its Experimental Inhibition by Rupatadine
Source: Research Square preprint supplement (doi:10.21203/rs.3.rs-589677/v1), 2021-06-09
Supplement: Supplementary file 1 [file 23098f54d3174ad6c71ff5d6.pdf]

## Supplementary figure 1: Expression of PAFR in different ovarian cancer cell lines.

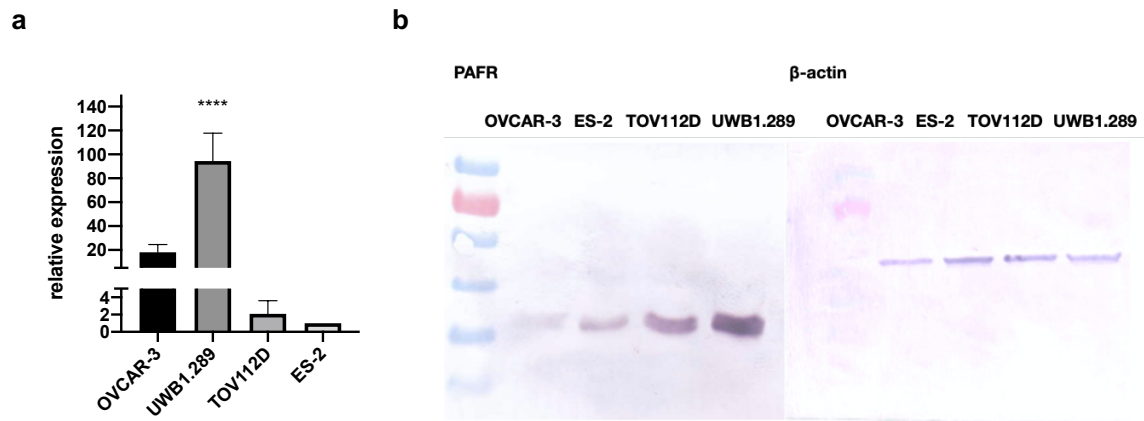

**Supplementary figure 1:** Expression of PAFR in different ovarian cancer cell lines. **(a)** PCR analysis of the four histological subtypes revealed an over-expression of the PAFR in serous cell lines (UWB1.289 and OVCAR-3). Results are represented as mean (SD) of 3 independent experiments. The difference was calculated relative to the ES-2 cell line with the ordinary one-way ANOVA test; \*\* $p < 0.01$ , \*\*\* $p < 0.001$  and \*\*\*\* $p < 0.0001$  compared with controls. **(b)** Especially the BRCA1 mutated cell lines showed an elevated protein expression

## Supplementary table 1: Sequences of primers used in qPCR to determine mRNA expression levels.

|         |                               |
|---------|-------------------------------|
| PAFR    | Forward: GGGGACCCCATCTGCCTCA  |
|         | Reverse: GCGGGCAAAGACCCACAGCA |
| β-actin | Forward: TCCTCCCTGGAGAAGAGCTA |
|         | Reverse: CGTGGATGCCACAGGACT   |
| GAPDH   | Forward: AGCCACATCGCTCAGACAC  |
|         | Reverse: GCCCAATACGACCAAATCC  |
